# Supplementary material for: Multiple timescales of learning within a single task: Continuous-time changes in evidence-accumulation processes during perceptual decision-making
Source: Research Square preprint supplement (doi:10.21203/rs.3.rs-2057667/v1), 2022-10-24
Supplement: Supplementary file 1 [file 0e2c1dca56d9f1a019866fea.docx]

# Supplementary Note

## Model specification and priors

We report model formulas in the common “Wilkensen” format, for clarity and similarity to the **R** implementation (example: driftRate ~ predictorA + (predictorB | groupingVariable)). In this syntax the predicted variable (here, the drift diffusion parameter) is to the left of a tilde. The predictors are to the right of the tilde. A 1 indicates an estimated intercept value. Components of the predictors in parentheses are random effects, with predictors to the left of the vertical bar and the grouping variable to the right of the vertical bar.

All models had the following shared features:

Both AVGP and NVGP were included, with main effects controlling for any inter-group differences on each parameter in any given model. (All parameters have participant-level estimated coefficients anyway). Trials with RTs below 0.16 or above 2.5 were excluded. Time-evolving components were estimated as binary log (i.e., base-2) of the time constant to 50% of change, and had priors of normal(9,3), i.e., centered on half of change occurring in 512 trials.

Drift rate was estimated with no link function. The prior was set to the default **brms** prior for the drift rate (given our data), student_t(3,1,10). Across models, drift rate was always estimated with a fixed-effect intercept, a by-subject intercept, and a by-subject slope for coherence (i.e., drift rate varied linearly, by subject, as a function of stimulus coherence). Models were tested that included either “raw” coherence percentages or their log transforms, in order to test the assumption that the relation between coherence and drift rate would be linear. Example formulas: fixed drift rate: drift_rate ~ 1 + VGPstatus + (coherence || subj), asymptote of a time-evolving drift rate: drAsym ~ 1 + VGPstatus + (coherence || subj).

Response boundary was estimated on a log scale. The prior for all models was set to the default **brms** prior for the response boundary (given our data), normal(-0.6, 1.3). By-subject intercepts and fixed-effects intercepts were estimated. Example formulas: fixed response boundary: response_boundary ~ 1 + VGPstatus + (1 || subj), asymptote of a time-evolving response boundary: rbAsym ~ 1 + VGPstatus + (1 || subj).

Non-decision time was estimated using an exponential distribution with an offset of .001 and a mean of .15 . This offset approach constrained sampling to plausible values and and improved model efficiency. To the extent that all models use this approach, there should not be any bias introduced into any models or comparisons. Fixed-effect intercepts as well as by-subject intercepts were estimated. Example formula ndt ~ .001 + ndtOffset; ndtOffset ~ 1 + (1 || subj). The bias term was estimated with a fixed-effect intercept and a by-subject intercept (i.e., bias ~ 1 + VGPstatus + (1 || subj)). The bias was estimated on a logit scale, and its prior was normal(0,1).

## Best-fitting model code

rt | dec(correct) ~ (drAsym + (drStart - drAsym) * (2^((1 - trial)/(2 + 2^drRate))))

bs ~ exp(rbAsym) + (exp(rbStart) - exp(rbAsym)) * (2^((1 - dayTrials)/(2 + 2^rbRate)))

ndt ~ 0.001 + ndtOffset

drAsym ~ isVGP + (coherence || subID)

drStart ~ isVGP + (coherence || subID)

drRate ~ isVGP + (1 || subID)

bias ~ isVGP + (1 || subID)

rbAsym ~ isVGP + day + (day || subID)

rbRate ~ isVGP + (1 || subID)

rbStart ~ isVGP + day + (day || subID)

ndtOffset ~ isVGP + (1 || subID)

All parameters to the left of tildes are estimated using the predictors to the right of the tildes. In the top block, the first three formulas predict the DR, RB, and NDT, respectively; these three are direct equations. The second block contains symbolic formulas in Wilkinsen notation predicting each of the parameters defined in the top block. The Wiener response distribution in **brms**/**rstan** was used, with model specifications being described in the Methods. The ndtOffset parameter had a prior defined by an exponential distribution with a mean of .15 seconds. All start and asymptote priors were defined identically to the **brms** defaults (taken from the constant model) which are by design minimally informative.

## By-participant model fits

By-participant fits used the same set of models (formulas and priors, as relevant to single participants) as the mixed-effects models fit to all participants simultaneously. Likewise, comparisons used LOOIC comparisons and Bayes Factors using bridge sampling. All indices indicated convergence.

## Logistic model fits

Logistic models utilized an approach that conforms more closely to classical analyses of psychophysics, that is, fitting a logistic psychometric function linking coherence to the probability of a participant responding that motion was in the rightward direction. A lapse rate of 1% was used. Like in the main results, performance (here, threshold) was modeled as a continuous exponential function of time, with “time” corresponding to within-session trial number, overall trial number, or a combination of the two. Response times were z-scored and by-participant random slopes of response times were estimated for each of the starting and asymptotic threshold parameters, as an rough method of including all of the information in the logistic models that had also been included in the DDM models

##### *Table 1. Bayes Factor (base-3 log) comparisons of models using 15 runs of bridge sampling, with the most equivocal being reported. Positive numbers indicate that the row model fit better, while negative numbers indicate that the column model fit better. Inf indicates that the bridge sampling procedure could not effectively estimate the relative evidence between models, with the row model being preferred.*

|  | A | B | C | D | E |
| --- | --- | --- | --- | --- | --- |
| F. Flexible DR, Flexible RB | Inf | 382.6 | 628 | -119.9 | 468.5 |
| E. Flexible DR, Continuous RB | Inf | -58.2 | 137.4 | -591.6 |  |
| D. Continuous DR, Flexible RB | Inf | 547.6 | Inf |  |  |
| C. Continuous DR, Day-resetting RB | 628 | -210.7 |  |  |  |
| B. Continuous DR, Continuous RB | Inf |  |  |  |  |
| A. Constant DR, Constant RB |  |  |  |  |  |
